# Supplementary material for: A facile microwave-hydrothermal synthesis of fluorescent carbon quantum dots from bamboo tar and their application
Source: Royal Society of Chemistry journal article supplement (doi:10.1039/c7ay01069a), 2017-01-01
Supplement: c7ay01069a1.pdf [file c7ay01069a1.pdf]

# **A facile microwave - hydrothermal synthesis of fluorescent carbon quantum dots from bamboo tar and its application**

Qian Liang <sup>a, b</sup>, Yulin Wang <sup>c</sup>, Fengcai Lin <sup>a</sup>, Maosheng Jiang <sup>c</sup>, Pengfei Li<sup>d</sup> and Biao Huang <sup>a, \*</sup>

<sup>a</sup> College of Material Engineering, Fujian Agriculture and Forestry University, Fuzhou, Fujian Province, 350002, China. E-mail: bhuang@fafu.edu.cn

<sup>b</sup> Jinshan College of Fujian Agriculture and Forestry University, Fuzhou, Fujian Province, 350002, China.

<sup>c</sup> College of Life Sciences, Fujian Agriculture and Forestry University, Fuzhou, Fujian Province, 350002, China.

<sup>d</sup> Guangxi Key Laboratory of Chemistry and Engineering of Forest Products, Nanning, Guangxi Province, 530006, China.

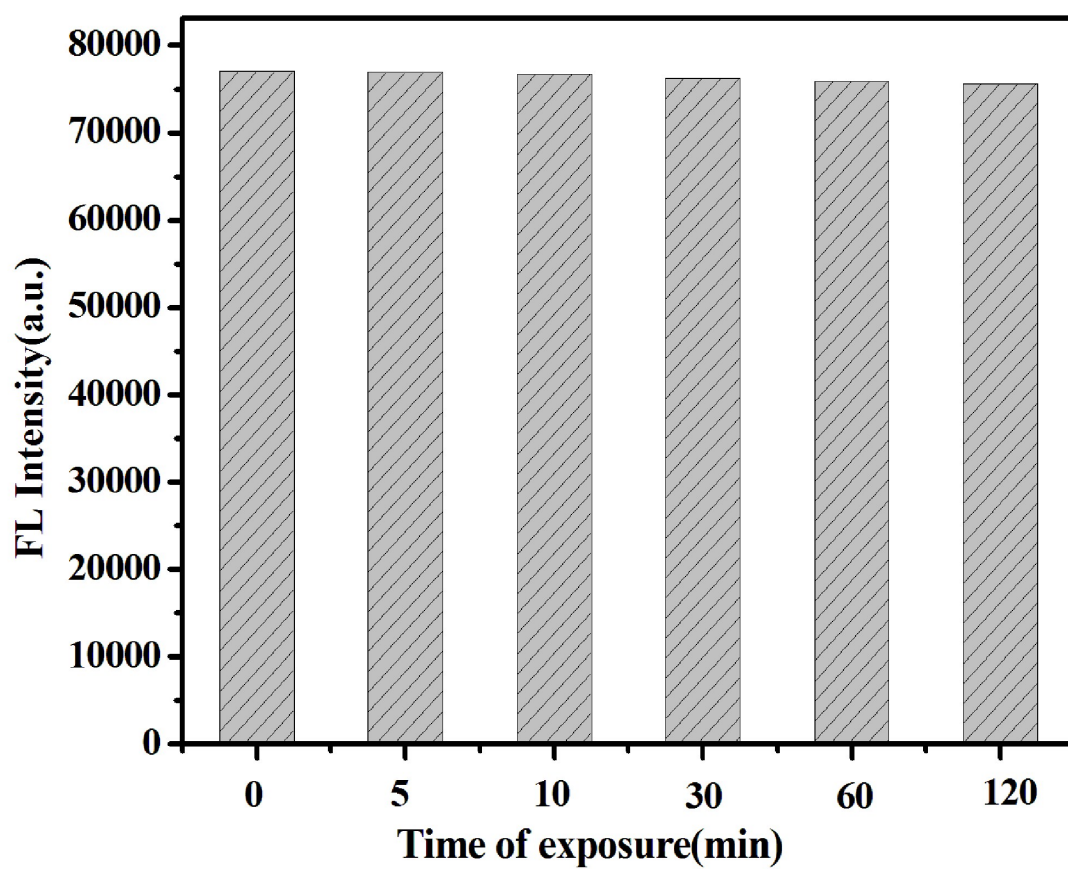

**Fig. S1** Photostability of the CQDs under continuous irradiation for 2 h.

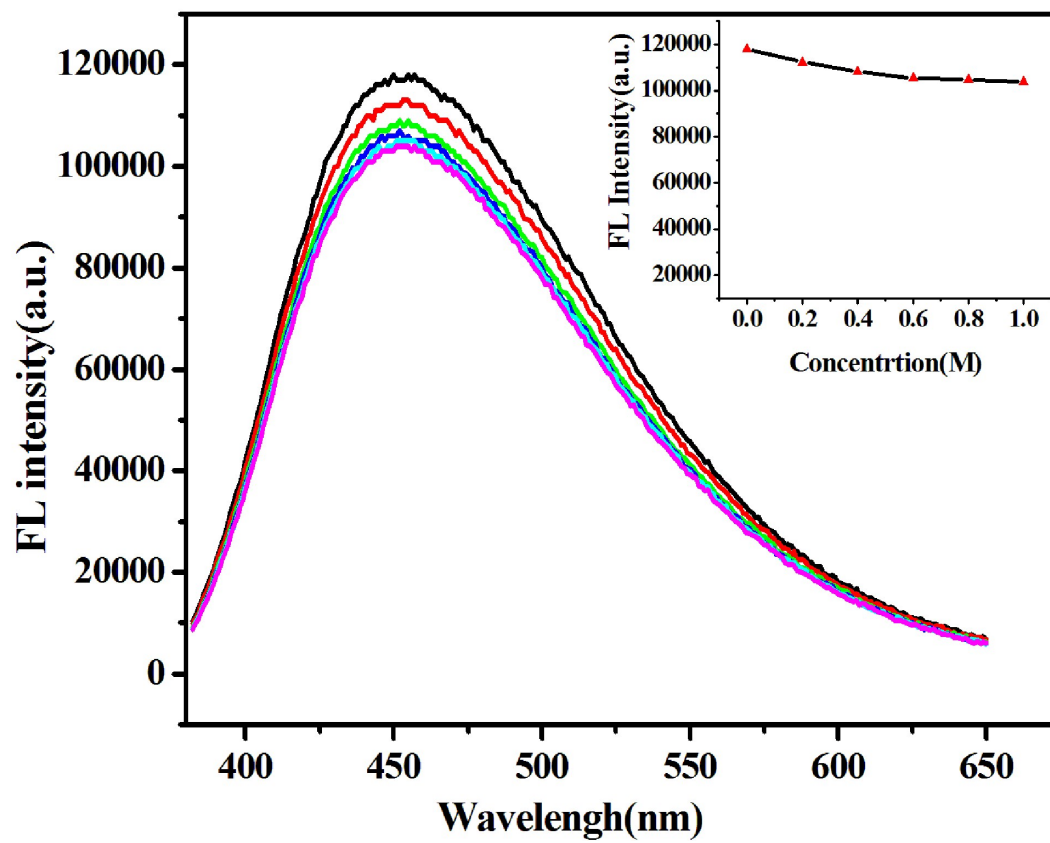

**Fig. S2** The effect of NaCl concentration on CQDs fluorescence intensity.

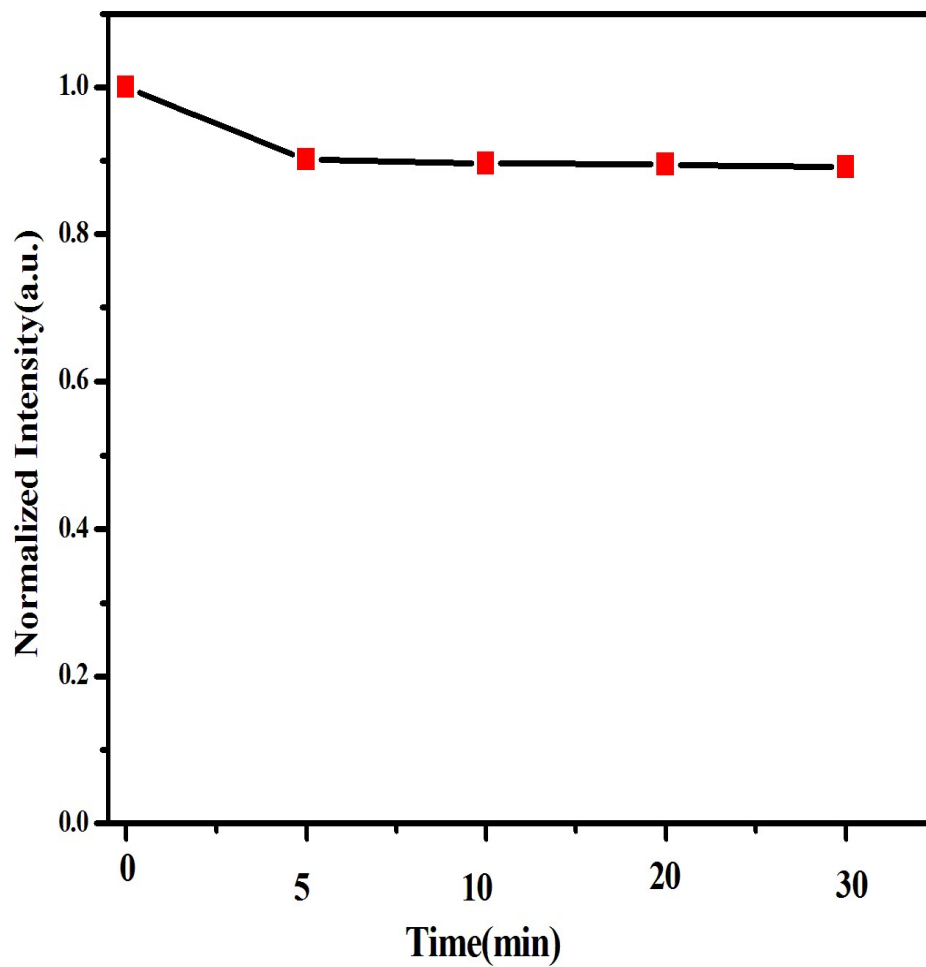

**Fig. S3** Effect of incubation time on the fluorescence quenching of the CQDs based fluorescence sensor toward TNP analysis. Conditions: 50  $\mu\text{L}$  CQDs + 200  $\mu\text{L}$  BR buffer solution (pH 3.0) + 10  $\mu\text{M}$  TNP.

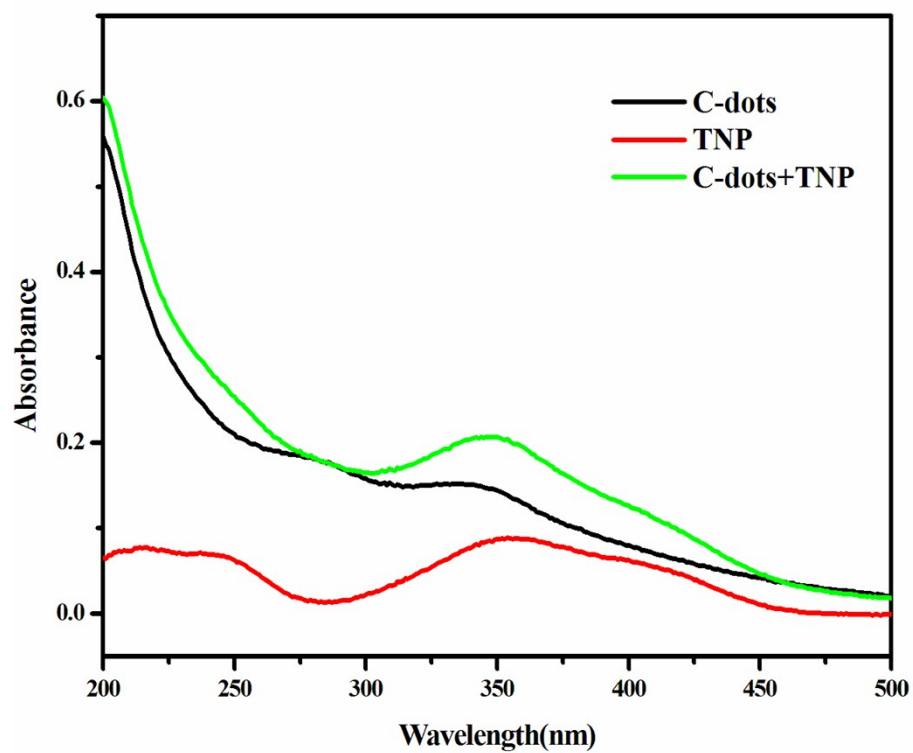

**Fig. S4** UV-vis absorption spectra of CQDs (black), TNP (red), and CQDs in the presence of TNP(green).

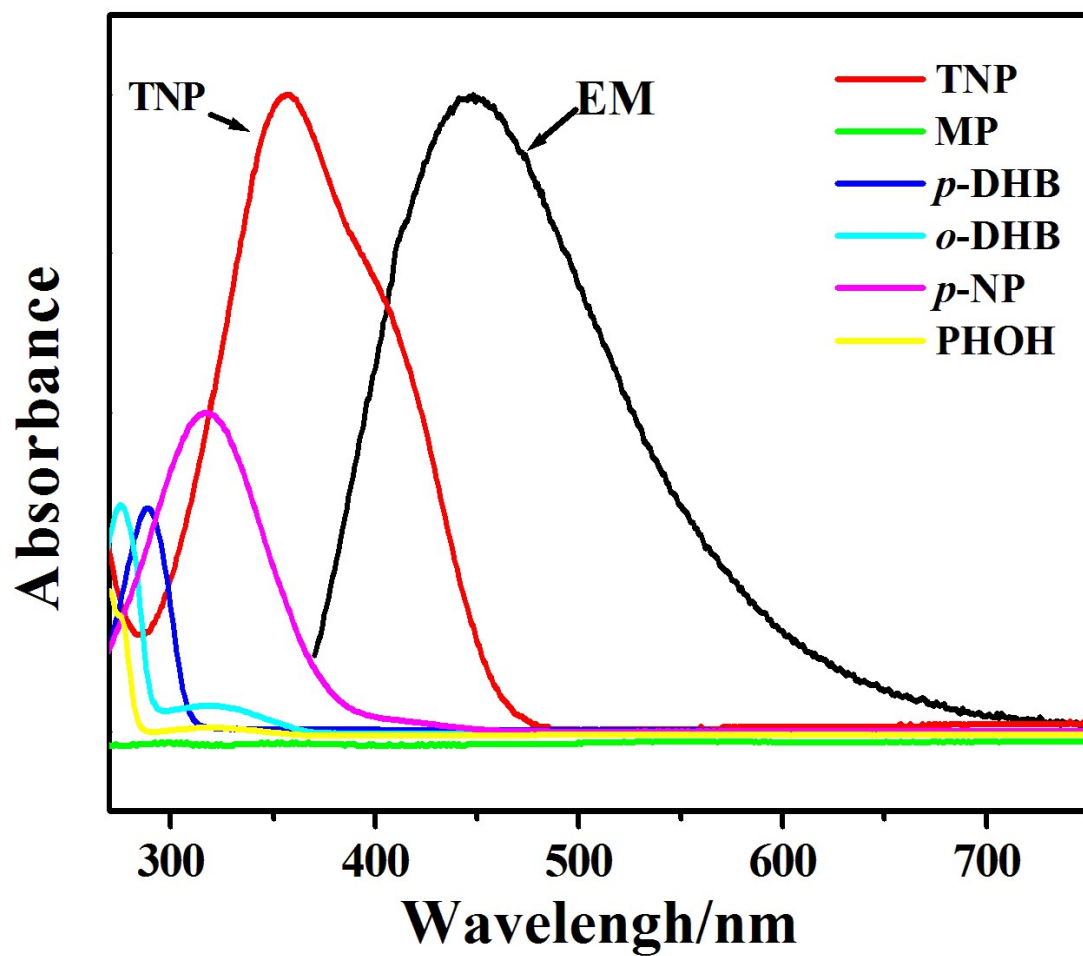

**Fig. S5** The UV-Vis absorption spectra of all niteoaromatic explosives and the fluorescence emission of CQDs (blank).

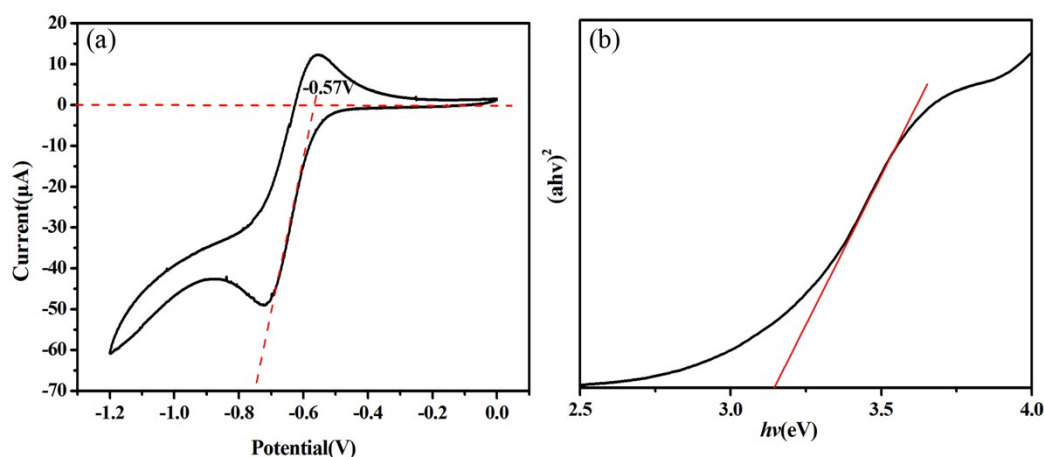

**Fig. S6** (a) Cyclic voltammogram of the CQDs in 0.1 M Bu<sub>4</sub>NPF<sub>6</sub>/acetonitrile solution at 100 mV/s. (b) Optical bandgap of CQDs obtained from the UV-vis absorption spectrum.

The HOMO and LUMO energy levels of CQDs were estimated according to the following empirical formula:

$$E_{\text{LUMO}} = -(E_{\text{red}} + 4.4) \text{ eV} \quad (1)$$

where Ag/AgCl electrode is employed as the reference. A typical CV curve for a CQDs thin film, deposited on a glassy carbon working electrode, is presented in Fig. S6a.

The  $E_{\text{red}}$  was determined to be -0.57 eV. The corresponding  $E_{\text{LUMO}}$  was calculated to be -3.83 eV. The HOMO was then estimated to be -6.98 eV according to the following equation .

$$E_{\text{HOMO}} = E_{\text{LUMO}} - E_{\text{g}} \quad (2)$$

Where the band gap energies ( $E_{\text{g}}$ ) were estimated to be 3.15 eV by plotting the square of the absorption coefficient ( $\alpha$ ) and photon energy ( $h\nu$ ) as a function of  $h\nu$  and extrapolating the linear portion to intercept the x abscissa (Fig. S6b).

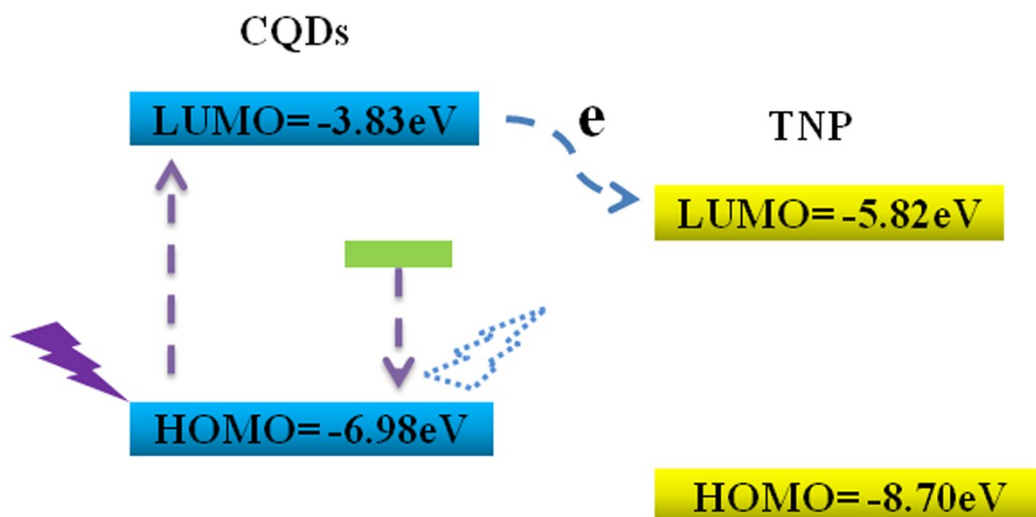

**Fig. S7** The  $E_{\text{HOMO}}$  and  $E_{\text{LUMO}}$  of CQDs and TNP.  $E_{\text{x}} = 380\text{ nm}$ ,  $E_{\text{m}} = 450\text{ nm}$ .
